# Supplementary material for: Phylogenetic analysis of the ATP-binding cassette proteins suggests a new ABC protein subfamily J in Aedes aegypti (Diptera: Culicidae)
Source: PubMed Central journal article supplement (PMC7339416; doi:10.1186/s12864-020-06873-8), 2020-07-06
Supplement: 12864_2020_6873_MOESM1_ESM.pdf [file 12864_2020_6873_MOESM1_ESM.pdf]

**Supplementary material: Rad50, SMC and MutS sequence proteins highlight Walker A, Signature and Walker B domains in this order.**

>AAEL005802-PA.NBD1

MDSAFLOFIEVDNFKSYRGKVTIGPLKKFSAVI **GPNGSGKS**NFMDAISFVMGEKTTSLRVRKLNELIHGA  
SIGRPVSNRASVMAKFIITDQEGNQTSKSFQRSVIGSSSEYRINGSVVTTNAYLQELEHIGINVAKNFL  
VFQGAVESIAMKNAKERTALFEEISGSGLLKEEYNKLKHEMQMAEETQFTYQKKKGIAAERKEAKLEKQ  
EADRYARLKDEYAEKQIQYQLYRLYHNEKETKRLYEDMESKQQDLTLIEKKKEEADDVLKEKKKEAGKTA  
RDLAKNEQEIREVESEMSKKHPMFIKAKEKVAHTKKKLD SAMKTLEQARKADEAHQADIRKLEDELKIE  
AKMKT FEDAIAGESK KRGSNVHLEQNLVQEYDR LKQKADATSGKYLIKLD SVNREQSDQDLLDSEINKK  
AQIEENYKKEYSERNEAAKRQEKLIDHIKASKQALEEQNRLKQELSQDVGSSKERILELQAE LDDVREQL  
GDAKIDKHEDARRKKKQEVVELFKQEVPGVYDRMINMCQPTHKRYNVAVTKVLGKYMEAIIVDTEKTARR  
CIQILKEKMLDVETFLPLDYLQKKPLKERLRNIEDPRNVKLIYDVLKFSPPQIEPAVL FATNNALVCETP  
DDAMKVAYEIDRSRYDALALDGTIFYQKSGIISGGSHDLARKAKRWDEKHMALKAQKEKITEELKEVMKK  
TRRQGELTTVESQIRGLENRLKYSQNDLDASKKNIKEYDKKLAALQLELDQIGPKISEIERRMQORDLKI  
QEIKENMNNVEDDVYAEFCARIGVANIRQFEERELVLQQERAKKRAEFEQQIDRINNNEFERSKDTSKN  
VTRWERAVQDDEDSLETFKQAEARQRQIEKDKERIEKMKVDKAAKKA AVDAMEEEMAKARRDVQQAKE  
LAAVHQQIAGIESKIE TMKNKRHNLLMQCKMDAIEIPMKRGKMNDIVEQTGGNESETTPLSTIYERAKI  
EIDYSSLPKNLTNPSEPDQVKKVGDGLARELQSKLDTLEKIQT PNLKAMQKLD RVT EKIQT TNEEF EAAR  
KKAKKAAAFEKIKNERCTLF TNCCNHISDAIDGIYKQLARNEAAQAYLGP DNPEEPYLDGINYN CVAPG  
KRFQPM SN **LSGGEKT**IAALALLFAIHSFQPA **FFVLDE**IDAALDNTNIGKVASYIREKCTNLQTVVISLK  
EEFYSHADILIGICPEPAECLVSQTLIYDLEQFTPHS

>AAEL015592-PA

MKVAYEIDRSRYDALALDGTIFYQKSGIISGGSHDLARKAKRWDEKHMALKAQKEKITEELKEVMKKTRR  
QGELTTVESQIRGLENRLKYSQNDLDASKKNIKEYDKKLAALQLELDQIGPKISEIERRMQORDLKIQEI  
KENMNNVEDDVYAEFCARIGVANIRQFEERELVLQQERAKKRAEFEQQIDRINNNEFERSKDTSKNVTR  
WERAVQDDEDSLETFKQAEARQRQIEKDKERIEKMKVDKAAKKA AVDAMEEEMAKARRDVQQAKELAA  
VHQQIAGIESKIE TMKNKRHNLLMQCKMDAIEIPMKRGKMNDIVEQTGGNESETTPLSTIYERAKIEID  
YSSLPKNLTNPSEPDQVKKVGDGLARELQSKLDTLEKIQT PNLKAMQKLD RVT EKIQT TNEEF EAARKKA  
KKAKAAFEKIKNERCTLF TNCCNHISDAIDGIYKQLARNEAAQAYLGP DNPEEPYLDGINYN CVAPGKRF  
QPM SN **LSGGEKT**IAALALLFAIHSFQPA **FFVLDE**IDAALDNTNIGKVASYIREKCTNLQTVVISLKEEF  
YSHADILIGICPEPAECLVSQTLIYDLEQFTPHS

>AAEL003449-PA.NBD1

MYIKSIIIDGFKSYGKRTEIHGFDPEFNAIT **GLNGTGKS**NILDSICFVLGISNLVHVRATSLQELVYKSG  
QAGVTKATVTLVFDNTDKDQCPLGYEKCNEISITRQIVVGGKNKYLINGKTVQNKVQDLFCVQLNVNN  
PNFLIMQGRITKVLNMKPQEILSMIEEAAGTSVYEAKREHSIKLIEKKDAKLNELYTVLREEIEPKLEKL  
RKERAHYIEYQKICRDI EYLTRLYISHKYLQHVKS VENSEKAI AALNDVISGHRNKIEAHITESKEIEQS  
AKALQELIDTEGGALAELEAELSAESKKEATASAERDSTKENIGAEQRKLNKQKSIRD DENALQKKEA  
EMQRTGDMFQSLKDADEADAKAFTDAQRF EAVSAGLSTNEDGEAATLQDQLMSAKQKAAESATS IKQSE  
MELKHCQQLLKEKQGMNSSDAAYLEDK KKLTKAESQIQSITAE LQKIDYEEGSIEQLHERKQVLSHEIR  
NLKSELDRKNAYRWEFQYRDPEPNFDRSSVHGMVAKLVAVRD KKYALS LGTAAGGSLSV VVDSDTV GKK  
LLQKGQLQSR TMIPLNKITSRMIDNNTVRVADNLV GKGRAVTALSCIN YERQLEPAMKFVFGHSFLADD  
MNVAKQVTYHPQIMSRSVTL DGDVVDPSGTL SGGAKAKGAVV LLEVEEINQIQKLLAQKEAEYQQVCAEI  
SKLERIAHRYNQLKEQQDMMNYELKTLQORLAQTSYQQAQQIEELKAKIETLQTMVDARQAQTQANAK  
VKDLTAKIADSKGHRERELKAAEDELKRAKKKSESRKNWKKHEQS FETLRLEIEELQKGIATAKEQA AK  
LEETIAELQRKLQAASENSAEMNKAVAAVKQKIKEHKDKINSQNKELKAKYHHRDKLLKQNEEMELD IKK  
KENEIQVRNENKDGYNKISALEEKYPWISEDKEFFGVKNTRYDYNKEDPQEAGRKLNLKQDSKEKMSRN  
INQKAMVLLEREEEQYKEVMRRKQVVEDDKKIQKIITDLDEEKKKQLKVAWTEVNFSGSIFSTLLPGT  
QAQLKPPDGVDFMKGLEVKVGFNGMWKESLTE **LSGGQRS**LVALSLI LAMLKYKPAP **LYILDE**EVDAALDLS  
HTQNI GNMLKAHFTNSQFVIVSLKDGMFNNANVLFRTKFDIGMSGVTRTVNVVAHAKAKAAGR

>AAEL006937-PA.NBD1

MHIKQVI IQGFKSYREQTVVVEPFDKRHNVV**GRNGSGKS**NFFYAIQFVLSDEFTHLRPEQRQALLHEGTG  
ARAMSAYVEI I FDNSDNRPIDKEE I FLRRVIGAKKDQYFLNKKVPRSEVVNLLSAGFSNSNPYYIVK  
QGKINQMATA PD SHRLKLLREVAGTRVYDERKEESMNI LKETDGKVEKIT EFLKTIEDRLKTL EEEKEEL  
KEYQKWDKARTLEY I I HETELKENKKHLDELEHQKSSGDKQKMFQEI IQTAQDKI KNAQKALKDAKKE  
VTTTKDEKSVLTTEHQQLREKTKLDTISDLTDEVQGDNKS KERAQE LNRKLTIAEKEKELEEVPR  
YEAMRRKEEECSRELNLKEQKRKELYAKQGRGSQFS SREERDKW IQGELKSLNKQIKDKIAHQNKLOEDL  
KRDAAKQKQDLEKKIEEHTESFEQLRIQIDEHNKHYYELKKKDH FQTI RNDIWKKETQVTQTL SGNKEEL  
AKADQALRSMAGKPI L NGRDSVRKVL E SFSQRGGQFADIARSY YGPVIENFNCDSIY TAVEVTAGNRLF  
HHIVESDRVGTQILKEMNKQKLPGEVTFMPLNRLQVRIHDY PEDPDSI PMISKLKYEEQYDKALRYIFGK  
TLICRNLERATELAKSTGLDCVTL EGDQVSSKGCLTGGYFNTRSRSRLEMQKKRSEYLQMIEDLEKELSEF  
RTELKQTESSINSVSEMQKTETKQGKSKDAFEKI QADIRLMKDELTRIERFRNPKERSLAQCKANLEAM  
NSTKDGLENELHQELMSQLSVQDQHEVDQLNDEIRKLNQENKEAFTARMSLEVTKNKLENLLTNNLFRRK  
DELVQALQEISVEDRKRQLTNCRTELSTEKRIKKVLSVDVDDIDKKVSEAVKQKALQKELELWMQKEKE  
AQDKMEEDSKRMEKWAAKENLLHQKIEECTEKIASLGALPQVDP SYQRMSLKT L FKELEKANHHLKKNH  
VNKKALDQFLSFSEQKEKLYKRKEELDIGGEKIRELMQNLEMRKVEAIQFTFRQVAANFTEVFKKLVPQG  
SGHLILRTQKDT EGN DMEKEVETSDEFTGIGIRVSTG VDAEMREMNO**LSGGQKS**LVALALIFAIQKCDP  
AP**FYLFDE** IDQALDAQHRKAVADMIHELSDKAQFITTTFRPELLEN AHK FYGVRFRNKVSHVDCVTREIA  
RDFVEDDTTHG

>AAEL001655-PA.NBD1

MSKNKRRSGGAAGQPPAAAQQPPAEAMEVDIDDDANI SEDEEGGTRVGGIYIPPPVPPYCS TECKGPRLI  
ITHISNYNFKSYAGHVMLGPFHQRFSAI**SPNGSGKS** NVIDSMLFVFGYRAQKIRSKKLSVLLHSSSKHP  
NTNSCSVGVHFKQI IDKEDGSFESVPNSEFVVARTAFRDNSSYYTVDNKR VHFKEVSKLLKHGIDLHN  
RFLILQGEVESISMMPKAMTENDCGLLEYLEDIVGTTRYKQPLVKINERVELLNEERTEKHNRCKLAER  
EMKDLEKPMHEAVEYILKLENSLTRTKNQIQKYISEQLKKIT ELEV EREQAGGI LKKHDETYEALKKERV  
EKEHLVKEEIKQYDGLVKKKDDKEAALKASLAN YTKVQANMKATNERRKKTKEQIEAEK KLLDLKEIPE  
KNAKEIAESEK KIESLTKQKGDIEAKLTENLATLKD ETKVLL EEEKELQTE LIDLKKA VDDSKSALS LAE  
SELKICQHNETTEKRKLET LKYSFEDSNKNFQEQARLQELEKNLPQLRTDLQTAKAKLQENVTEEKELR  
SQLRTVQGLQESMQAVQSTRSQGKVL DALKQKNEGRIPGILGRLGNLGGIDSKFDVAISTCCGHLDFI  
VVETVNTAQACIDY LKSDIGRASFI ALEKIQQYQQYCHRQIQTPENVPRLFDLIHVEDERVLPAFYFAL  
RDTLVAENLDQQR IAYGAKRYRVVTLGGDV IETSGTMSGGGRSMQRGRMGTKVQTKTSASDTPKSNKEL  
EHLQVRAQEIQSQINFLQEQQGELEQQIQRMGSQ LKNQENEVKRLKMDVTS LAEQPLRKDQVERQQARV  
AQTHSDPEKVRAL EAQVAECKETHTKSSEAANTI QKQVDGVTKKINDITNSKV KDLQTKINNLTKQIDKL  
TTNISKLTVEVKTSE RNVKKTEDKIKNMEEEVISA EQAIRSGCEEREAL EKEASDLKQEI DELKVEIEKA  
HDGSSSIKKEI VAIQKKEAEGMKRLEFEQILQSIEKKLSEVKD TI PHWKNKLPKLKHEIPGEPAPEPL  
KEYTEEELNSYKLSDLQYQFSIQEEKLNASKPNLSVIEEF LRKQEA YLQ RVAILEEITAKRNEMRQYDD  
VRKKRFTEFMQGFH IITK K LKEMYQMITLGGDAE LELVDSMDPFNEGIVFSVRPPKKS WKMISN**LSGGEK**  
**FLSSLALVFALHYKPSF****LYVME** EIDAALDFKNVSI VAHYIKERTKNAQFV IISLRSNM FELSDYLVGIY  
KVTDCTNSVTIENDPPKFHHSSTQQQSQSFFNP NLSLQSDGLDQSLPKDEKTKTEDSLQKSDSQKENIP  
EPSPV SQQPMEVSV EAN

>AAEL002581-PA.NBD1

MGHVFDG PAPT R KRYCINSASIEFMPAGSERKDHK LKTKHTGSKSSQQVQIVAPQADKVERAI IHDIEK  
YVRSGKILKMQLKNFMCHRNLVVEFNKRANLLV**GNNNGSGKS**AVLAALTIGLGCSANLTNRSSSVKQLIKH  
GETQASIEIHLGNDSFDAYERDVYGDRI I I IRTINASGATS YK LKSEQGRVISQSRSDLLKMILF LNIQV  
DNPVCV LNQDLARSFLKDSDEKKQYNLFLKATQIDSITAKLNGCTPQLEN AKHNLD CNEKSLKYIEREIE  
EMQQKYENLQSV EKWKDQVKLARLKL GWRVVIDQFTECSQVEDK LREK VNTMKEHMNAIQNREALEAEID  
RVIQRFRNDIDAKKTGF AEVKDKYMQARRV GQSLQEQLSDKSRQM KVKDRLARQAEDIKNLEADLKQRS  
ESGSNRMADEKRREQQ LSELSEK KRD LQAMVENAKRDVDILHNTLNQIRETKDEANSKRVSQHERTRT  
EMQLQQFESSRDNL SVFGQNP AFVAKIKQMHQQGRFTELPRGPLGQYIKVKDKKWTAMIETVISPGIL  
TAFYVNSDADRNTLNQLIQREFPEMRGRS I I TS RFHKEVYDVRSGRVE TVQNAHMLMNLINVS DPVVMNC  
LIDQIKIETILVVDQNLAMD L TSH TENVPKNLQKVVMPEPFSEFFPMPNYSYGLQKKSARYLQVNMTE  
LKKQTERRMQQLDQELNEIKHQIEEETRKLGERERALQDKQRQMAKQQE LNSLEL KINELKAIEYPAES  
EDMTLQNELEELKASQIKLNEELEQE KSKLQSSVNEITDQERI IQEKKDHMTKIESEIQEQDKIDAEMQ  
KRHDMQANAKTKQQNLRLQEVEVQTMQAERNERKQALAAATSAAQELGERVEVKETQEQLKKAISSTEKR  
IKNINSANDDIVDVKAI LENKILKRDTSLRYTDSLK KIKLLTNSRSARYAYLHKLKSHMSLRVKKHFNM  
VMQLRGFVGEIVMDTKNGT LSLSVVPRDKNISNAVCNTKS**LSGGERS**YSTVAFLIALWSCVDTP**FYFLDE**  
YDVFTDQVNRHMMTMLLLNETKKRPDRQFCFLTPQDMSNIQASDDLTIHRMADPERC

>AAEL005245-PA.NBD1

MPPNKR MINTKEDQQNQIRSKI QNLFKGSFHELEIEIQNFQKSKSSKLELREAESDLS SRKAQEKVLQ

SKIQDFESRRIHLNTRKRGQEQDLCGDRSKKMVALCDRLKLPVGDVEAGGADVESALKAIKHGIRSEETA  
VQTLKSHDEADYKAQKAIKDLREDKTKLEADFRMKGQMVADVFVREKAKTQSEIATIQRSAETLKKIVTE  
IEKLEKDYENQKSNVVEGMRRQLAEKKIKHEELQAKLDRVEEQISALDAVAKATELHLKEQQFNAKES  
EFKRLRNKHTENLKRFLFPSKTI DTNYKRNVTLYDDLQRQIKQLNESMRKSQATVTEMETTRRSQKRELD  
RIERELTENKEKIYTVQCQGNPFEEVLAKLKDKISKNNLEHGELRSAEVLYKKYISRIEDDKCCPVCHKGM  
DGADVQDISSELSDEIRRLPEKIEALERMLKADQKKYDQLLALQPYSERIAKQTEEIPKLKEQLEETERK  
LVQASSDLEECQMSILEPNSSVQLINSILGDMSILDESVRDIDRMKKGIEENLKEIEVAVKTPEGTTASLDD  
IKLREALRGEELRVERISIDAMQNKIDEETERLNNLHQRYNQMKEKKIQLQESVQSLDQKKAKELELGEK  
IASCQREMDTENKLGPKVQNLITTEEKSKAKAKEENRANLNKAQAELEELKRMDAEIVRLCKELDALSRL  
NLAAEQIKIKRKLQESNEEMKKIAAIDEKTYQIDS LKKEVMNQDMIERYLDNRDLMLKDKDETTSLKQG  
LDALMQSIGDMDAPNVAQERNKLEQRDAIQSTKSQTTGQIAELENQSKALKKELDRSEFKNAVKNYLKT  
YSESVVLKKMISDILKYRNALEWALMKYHAEKMEQINRSIYSLWRDIYRGNDIDYIRIKTEDESKPKVVT  
DKRRQYHYRVVQAKNDVEIDMRGRCSAGQKVLASLIIRMALAETFSNNCGVMALEPTTNLDRENIASLC  
ESLRRIVTERENGNFLLVITHTHEDFVTKLEKFDTYRVS RDHDGKSI IKEEQ L

>AAEL014748-PA.NBD1

MPCLCGMIKIETLRSTYVNSERFRWINTKEDQQNQIRSKIQNLFKGSFHELEIEIQNFKQSKSSKLELR  
EAESDLSSRKAQEKVLQSKIQDFESRRIHLNTRKRGQEQDLCGDRSKKMVALCDRLKLPVGDVEAGGADV  
ESALKAIKHGIRSEETA VQTLKSHDEADHKAQKAIKDLREDKTKLEADFRMKGQMVADVFVREKAKTQSE  
IAAIQRSAETLKKIVTEIEKLEKDYENQKSNVVEGMRRQLAEKKIKREELQAKLDRVEEQISALDAVA  
KATELHLKEQQFNAKELEFKRLRNKHTENLKRFLFPSKTI DTNYKRNVTLYDDLQRQIKQLNESMRKSQA  
TVTEMETTRRSQKRELD RVERELTENKEKIYTVQCQGNPFEEVLAKLKDKISKNNLEHGELRSAEVLYKKY  
ISRIEDDKCCPVCHKGMDGADVQDISSELSDEIRRLPEKIEALERMLKADQKKYDQLLALQPYSERIAKQ  
TEEIPKLKEQLEETERKLVQASSDLEECQMSILEPNSSVQLINSILGDMSILDESVRDIDRMKKGIEENL  
IEVAVKTPEGTTASLDDIKLREALRGEELRVERISIDAMQNKIDEETERLNNLHQRYNQMKEKKIQLQES  
VQSLDQKKAKELELGEKIASCQREMDTENKLGPKVQNLITTEEKSKAKAKEGNRANLNKAQAELEELKRM  
DAEIVRLCKELDALSRLNLAAEQIKIKRKLQESNEEMKKIAAIDEKTYQIDS LKKEVMNQDMIERYLD  
NRDLMLKDKDETTSLKQGLDALMQSIGDMDAPNVAQERNKLEQRDAIQSTKSQTTGQIAELENQSKALK  
ELDRSEFKNAVKNYLKTYSESVVLKKMISDILKYRNALEWALMKYHAEKMEQINRSIYSLWRDIYRGNDI  
DYIRIKTEDESKPKVVTDKRRQYHYRVVQAKNDVEIDMRGRCSAGQKVLASLIIRMALAETFSNNCGVMA  
LEPTTNLDRENIASLCESLRRIVTERENGNFLLVITHTHEDFVTKLEKFDTYRVS RDHDGKSI IKEEQ  
L

>AAEL011780-PA.NBD

MSKNKDKLNSNTLNFYFAKSPATPKIKPVSGSSNPGTPVSSSNGGTPKGVIKQEKVTPSPAADKPLNG  
NDEDEDEIQPMKKRRRIVMMDDDEDGSDSENROKNDKTPPKAELLASFKRVEKDEASESPVQKKVKEA  
EDVAEGKPDLAGAEEGASVLDPEPTVWAHQKLDLFLKPEIKDIQGNRPSSEKYDSRTLYVPESFLGTLT  
PAMRQWELKCRHMDCVLFFKVGKIFYELYHMDATVGVVEELGFSYMKGEFAHSGFPEQAYERMATLLVDKG  
FKVARVEQTEPTDMMQERCRKNKTNISKYDKVVKREICQVSLKGTVEVFGQQVHLTLNHQPKYMLAITERIK  
GEVGSRYGVCFIDTSLGVFHVGEFEDDSQGSRLTLTSHYAPALVLQERNVVSAAATQQIFKTVLAGIRKE  
ALTNESQFWSAERTLKYLAENFYGGSTDDQNSKWPEVIRSLDKSDHLGLTPDGNFKLALKALGGCIWYL  
KRCLLDQQIISLASFVMIIPDDVETCKNLRIVNSNRFMVLDSVTLNNLRITEGEQSLVNRMDHCCTKFG  
KRLHHWICSPSCERDVIVQRQEA VTELEDVSLLDQVQRQILGELPDLERMLAQIHTFGNAERSKNHPDG  
RAILYEEQTYGKKKIQDFINTLKGFGLTKLPELFGKVSSKLLVQLTQT SERGGSFPDMADKIRFFDEAF  
DHEQALKDGVIAPEGGLDAEYDAVHKEIKNILEELEEYKRKQEKYFGCKIAFFGTDKKRFQLEIPESA  
KANSGYTLEGHKKGNKGVKRYHTDETRFLKRMQTEDQRKMVLKDLSSRIFEKFSSYEMWRTCIDLGT  
TLDVLTSLAEYARSEGNCVPEILDSDAGQVFELEEGIHPCVSDSENYIPNGVNIGGEGAPLVLLTGPNI  
GGKSTMMRQVGI LAVMAQIGSRI PAESCRMTLIDRI FTRLGANDD IMAGHSTFLVELNETSTILKHATR  
SLVLLDELGRGTATYDGTIAGAVNFLADLKCRSMFSTHYHNLVDNFSTDSRVRLGHMACMVENEDDED  
PTQETVTFLYKYADGACPKSYGFNAAKLAGMPACI IKRAHEL SKTVEADALKRRI FTNSLLQEDPHDLKE  
LLNLKACRF
